# Supplementary material
Source: HighWire-hosted journal article supplement (https://www.jpn.ca/highwire/filestream/89377/field_highwire_adjunct_files/0/jpn-190031-1-at.pdf)
Supplement: jpn-190031-1-at.pdf [file jpn-190031-1-at.pdf]

**Appendix 1** to Ehrlich S, Bernardoni F, Bernhardt N, et al. Metabolic state and decision-making in acute and recovered female patients with anorexia nervosa. *J Psychiatry Neurosci* 2020.

DOI: 10.1503/jpn.190031

Copyright © 2020 The Author(s) or their employer(s). To receive this resource in an accessible format, please contact us at [cmajgroup@cmaj.ca](mailto:cmajgroup@cmaj.ca).

*Online appendices are unedited and posted as supplied by the authors.*

**Metabolic state and value based decision-making in acute and recovered female patients with anorexia nervosa**

Fabio Bernardoni PhD<sup>1,§</sup>, Nadine Bernhardt PhD<sup>2,§</sup>, Shakoor Pooseh<sup>2,3</sup>, Joseph A. King PhD<sup>1</sup>, Daniel Geisler MSc<sup>1</sup>, Franziska Ritschel PhD<sup>1</sup>, Ilka Böhm PhD<sup>1</sup>, Maria Seidel PhD<sup>1</sup>, Veit Roessner<sup>4</sup>, Michael Smolka<sup>2</sup>, Stefan Ehrlich PhD<sup>1,4</sup>

<sup>1</sup> Division of Psychological and Social Medicine and Developmental Neuroscience, Faculty of Medicine, Technische Universität Dresden, Dresden, Germany

<sup>2</sup> Department of Psychiatry and Psychotherapy, Technische Universität Dresden, Dresden, Germany

<sup>3</sup> Freiburg Center for Data Analysis and Modeling, Albert-Ludwigs-Universität Freiburg, Germany

<sup>4</sup> Translational Developmental Neuroscience Section, Eating Disorder Research and Treatment Center, Department of Child and Adolescent Psychiatry, Faculty of Medicine, Technische Universität Dresden, Dresden, Germany

**Appendix 1** to Ehrlich S, Bernardoni F, Bernhardt N, et al. Metabolic state and decision-making in acute and recovered female patients with anorexia nervosa. *J Psychiatry Neurosci* 2020.

DOI: 10.1503/jpn.190031

*Online appendices are unedited and posted as supplied by the authors.*

## Methods

### *Clinical assessment*

Exclusion criteria, comorbid psychiatric diagnoses and possible confounding variables were obtained using the expert form of the Structured Interview for Anorexia and Bulimia Nervosa (SIAB-EX; Fichter & Quadflieg 2001), medical records and our own semi-structured research interview. To ensure high diagnostic standards, only staff with a psychological or medical background was allowed to conduct the SIAB-EX assessment, after a diagnostic training had been completed successfully. The training included several steps to learn an adequate usage and evaluation of the interview, and was supervised by a qualified clinical psychologist. Only after reaching an acceptable inter-rater reliability, trainees were allowed to conduct the interview on their own.

The in-house semi-structured interview has been used continuously in our ongoing studies on AN (Ehrlich *et al.* 2015; Boehm *et al.* 2016; King *et al.* 2016; Bernardoni *et al.* 2017; Seidel *et al.* 2018) and helps to assess the following demographic and clinical data: socio-economic status, family history, detailed information on body weight, including highest and lowest lifetime-BMI and weight changes over the past six weeks, detailed information on menstrual cycle and contraceptives intake, current and past medical problems, current and past psychiatric or psychological treatments, current and past medication intake and nicotine use.

Finally we used BMI Standard Deviation Score (BMI-SDS) instead of BMI for statistical analysis providing an index of weight to height ratio that is corrected for age and gender (Kromeyer-Hauschild *et al.* n.d.; Hemmelmann *et al.* 2010).

### *Comorbidities*

14 (14.9%) of acAN participants had associated psychiatric comorbidity (4 depressive disorders, 4 obsessive compulsive disorders, 2 anxiety disorders, 6 other disorders namely mutism, somatization disorder, social phobia and PTSD). 10 (27%) of recAN participants had associated psychiatric comorbidity at the time of treatment (6 depressive disorders, 1 obsessive compulsive disorders, 3 anxiety disorders, 4 other disorders namely panic disorder, insomnia and adjustment disorder).

### *Study Protocol*

Following an overnight fast, blood was drawn into tubes containing EDTA (1.6 mg/ml) and aprotinin (270 KIU/ml) between 7:30 and 8 a.m. Subsequently participants underwent a one hour MRI scan including structural scans and a resting state fMRI run. Afterwards they had a standardized breakfast and immediately started the value-based decision-making battery (VBDM) at 9.30 a.m.

**Appendix 1** to Ehrlich S, Bernardoni F, Bernhardt N, et al. Metabolic state and decision-making in acute and recovered female patients with anorexia nervosa. *J Psychiatry Neurosci* 2020.

DOI: 10.1503/jpn.190031

*Online appendices are unedited and posted as supplied by the authors.*

### *Value-based decision-making (VBDM) Battery*

The battery provides measures of impulsive decision making from four independent tasks: **delay discounting (DD)**, **probability discounting of gains (PDG)**, **probability discounting of losses (PDL)**, and **a mixed gambles (MG)**. In all tasks, participants repeatedly had to decide for one of two offers presented simultaneously on a computer screen based on which is the more appealing to them (forced choice). In the DD task participants had to choose between a small immediate reward and a larger but later reward allowing to assess the rate of delay discounting. In PDG and PDL, the choice was between a sure gain or a sure loss and a larger but uncertain gain or loss, providing measures of probability discounting for wins and losses, respectively. In the MG task participants had to decide whether to accept or not a gamble in which they could win or lose money, which allowed to measure the degree of loss aversion.

**Settings:** Offers were randomly assigned to the left or to the right of the screen. There was no time limit to make a choice between the options presented in each trial. Outcomes of gambles were never presented during the experiment. However, subjects were informed that at the end, one trial per task would be selected randomly and according to their choice credited to their compensation. Task parameters were set as follows: For DD, delays were set to the values of 3, 7, 14, 31, 61, 180, and 365 days. Monetary rewards ranged from 0.30 to 10€. For PDG and PDL, possible probability values were set to 2/3, 1/2, 1/3, 1/4, and 1/5. Amounts ranged from 0.30 to 10€ in PDG and -0.30 to -10€ in PDL. For the MG task, amounts ranged from 1 to 40€ for gains and -5 to -20€ for losses. At the beginning of the MG task, subjects received 10€ “house money.” Task length for DD, PDG, and PDL was 30, for MG 40 trials. The experiments were presented using MATLAB Release 2010a (The MathWorks, Inc., Natick, MA.) and the Psychtoolbox 3.0.10 based on the Psychophysics Toolbox extensions (Brainard 1997; Pelli 1997).

Subjects with missing data due to technical issues were excluded from the analyses that required that specific data.

**Choice parameters:** The subjective value  $V$  of any monetary amount  $A$  in the number of days  $D$  has been modeled hyperbolically (Mazur 1987), and the degree of this devaluation is described by the discounting parameter  $k_{DD}$ :

$$V = \frac{A}{1 + k_{DD} * D}$$

High  $k$  values reflect steep discounting of delayed outcomes and, therefore, a tendency to favor immediate options, which is considered impulsive decision making. Hyperbolic discounting has also been used to compute the subjective value of probabilistic gains or losses, as a function of  $\theta$ , “the odds against” the event of winning or losing (Rachlin *et al.* 1991; Green *et al.* 1999):

$$V = \frac{A}{1 + k_{PD} * \theta}$$

**Appendix 1** to Ehrlich S, Bernardoni F, Bernhardt N, et al. Metabolic state and decision-making in acute and recovered female patients with anorexia nervosa. *J Psychiatry Neurosci* 2020.

DOI: 10.1503/jpn.190031

*Online appendices are unedited and posted as supplied by the authors.*

so that in this case  $k_{PD} = 1$  would reflect no discounting. Indeed, in that case, being  $p$  the probability for a win or loss,  $\theta = (1-p)/p$  and  $k=1$  would imply  $V = A * p$ . In this framework, going for the uncertain option is considered a risk seeking behavior, whether a loss or a win. While in the case of wins  $k_{PDG} > 1$  leads to the depreciation of the uncertain reward and induces therefore a risk-averse behavior, in the case of losses  $k_{PDL} > 1$  reduces the subjective value of the loss and is therefore linked to a risk-seeking behavior (Shead & Hodgins 2009). Previous studies have revealed a common decision bias to be risk averse for gains but risk seeking for losses (Kahneman & Tversky 1979) This introduces the concept of loss aversion, namely the tendency to weight the absolute value of losses higher than the absolute value of gains when comparing a loss and a gain directly with each other. In the MG task subject are presented with a 50/50% gamble of gaining one amount  $G$  or losing another amount  $L$ . The subjective value of the gamble can be estimated according to a simple linear model (Tom *et al.* 2007)

$$V = \frac{1}{2}(G - \lambda L)$$

so that  $\lambda > 1$  indicates some degree of loss aversion.

**Bayesian estimation:** To provide behavioral estimates of the discounting parameters, a trial-by-trial adaptive Bayesian approach for binary choice presentation was used (Pooseh *et al.* 2018). The main advantage of this approach is its isochronous adaptive nature. After each trial, the individual choice parameter is estimated and informs the options in the next trial, thus providing the most informative offers near the individual indifference point. This procedure allows for a very efficient inference of behavioral parameters. Behavioral parameter estimates across all sampled participants converged well and yielded stable final estimates of choice behavior (Figure S2).

So far the battery has been applied in studies of healthy participants (Deza Araujo *et al.* 2018; Neukam *et al.* 2018; Pooseh *et al.* 2018), in a clinical cohort (Bernhardt *et al.* 2017) and under a pharmacological intervention (Bernhardt *et al.* 2019).

## Supplementary analyses

To test whether our results were driven by participants with psychiatric comorbidities, we repeated our analyses by excluding participants from the acAN and recAN groups with such conditions. The same effects and group differences were revealed as in our main analyses, namely an increased risk aversion in the recAN group as compared to HC and a preference for the delayed reward option in the acAN participants with high ghrelin concentrations. The results of these analyses are reported in Tables S1 and S2.

Similarly, while we have considered recovered participants that met our rather strict recovery criteria continuously during a time frame of 6 months, there is an ongoing debate regarding the definition of recovery of AN (Bachner-Melman *et al.* 2006; Couturier & Lock 2006; Bardone-Cone *et al.* 2007; Khalsa *et al.* 2017). To test the robustness of our findings of an increased risk aversion in the recAN group, we

**Appendix 1** to Ehrlich S, Bernardoni F, Bernhardt N, et al. Metabolic state and decision-making in acute and recovered female patients with anorexia nervosa. *J Psychiatry Neurosci* 2020.

DOI: 10.1503/jpn.190031

*Online appendices are unedited and posted as supplied by the authors.*

repeated our analysis by excluding recAN participants that had been recovered less than 12 months (n=2). The results were unchanged (see Table S3).

## **Supplemental Tables**

**Table S1** Group differences in decision-making parameters

| <b><u>Task</u></b> | <b><u>Group</u></b> | <b><u>Post-Hoc t</u></b>    | <b><u>Age</u></b>   |
|--------------------|---------------------|-----------------------------|---------------------|
| <b><u>DD</u></b>   | <b><u>0.261</u></b> | <b><u>n/a</u></b>           | <b><u>0.006</u></b> |
| <b><u>PDG</u></b>  | <b><u>0.010</u></b> | <b><u>recAN&gt;HC**</u></b> | <b><u>0.568</u></b> |
| <b><u>PDL</u></b>  | <b><u>0.616</u></b> | <b><u>n/a</u></b>           | <b><u>0.134</u></b> |
| <b><u>MG</u></b>   | <b><u>0.709</u></b> | <b><u>n/a</u></b>           | <b><u>0.704</u></b> |

P-values of F-tests derived from GLMs computed on a sample not including acAN and recAN participants with psychiatric comorbidities. The model includes group as factor and mean subtracted age as a covariate. The group effect was significant for PDG. A posthoc t-test ( $t=2.914$ , Estimate (SE) = 0.47(.16),  $p = 0.007$ ; posthoc t-test, Bonferroni-corrected) revealed increased risk aversion for gains in recAN as compared to HC. Abbreviations: DD = delay discounting; MG = mixed gamble; PDG = probability discounting for gains; PDL = probability discounting for losses; Significance codes: \*\*\*<.001, \*\*<.01, \*<.05, Bonferroni corrected.

**Table S2** Ghrelin effect on decision-making parameters

| <b><u>Task</u></b> | <b><u>Group</u></b> | <b><u>Age</u></b>   | <b><u>ghrelin</u></b> | <b><u>ghrelinxgroup</u></b> |
|--------------------|---------------------|---------------------|-----------------------|-----------------------------|
| <b><u>DD</u></b>   | <b><u>0.397</u></b> | <b><u>0.003</u></b> | <b><u>0.115</u></b>   | <b><u>0.019</u></b>         |
| <b><u>PDG</u></b>  | <b><u>0.007</u></b> | <b><u>0.987</u></b> | <b><u>0.224</u></b>   | <b><u>0.425</u></b>         |
| <b><u>PDL</u></b>  | <b><u>0.529</u></b> | <b><u>0.161</u></b> | <b><u>0.432</u></b>   | <b><u>0.294</u></b>         |
| <b><u>MG</u></b>   | <b><u>0.502</u></b> | <b><u>0.605</u></b> | <b><u>0.299</u></b>   | <b><u>0.083</u></b>         |

P-values of F-tests derived from GLMs computed on a sample not including acAN and recAN participants with psychiatric comorbidities. The model includes group as factor, age and ghrelin as a covariate, and the groupxghrelin interaction. The groupxghrelin interaction was significant for DD. The linear coefficient relating ghrelin and  $k_{DD}$  was decreased in acAN when compared to HC resisting at the trend level when correcting for multiple testing ( $t(97) = -2.132$ , Estimate(SE) = -.0032(.0015),  $p$

**Appendix 1** to Ehrlich S, Bernardoni F, Bernhardt N, et al. Metabolic state and decision-making in acute and recovered female patients with anorexia nervosa. *J Psychiatry Neurosci* 2020.

DOI: 10.1503/jpn.190031

*Online appendices are unedited and posted as supplied by the authors.*

= 0.066; posthoc t-test, Bonferroni-corrected). Abbreviations: DD = delay discounting; PDG = probability discounting for gains; PDL = probability discounting for losses; MG = mixed gamble.

**Table S3** Group differences in decision-making parameters including only recAN participants recovered for more than 12 months

| <b>Task</b> | <b>Group</b> | <b>Post-Hoc t</b>    | <b>Age</b>   |
|-------------|--------------|----------------------|--------------|
| <b>DD</b>   | <u>0.344</u> | <u>n/a</u>           | <b>0.018</b> |
| <b>PDG</b>  | <b>0.012</b> | <u>recAN&gt;HC**</u> | <u>0.898</u> |
| <b>PDL</b>  | <u>0.393</u> | <u>n/a</u>           | <u>0.188</u> |
| <b>MG</b>   | <u>0.388</u> | <u>n/a</u>           | <u>0.523</u> |

P-values of F-tests derived from GLMs computed on a sample excluding recAN participants recovered for less than 12 months. The model includes group as factor and mean subtracted age as a covariate. The group effect was significant for PDG. A posthoc t-test ( $t = 2.926$ , Estimate (SE) = .43(.15),  $p = 0.007$ ; posthoc t-test, Bonferroni-corrected) revealed increased risk aversion for gains in recAN as compared to HC. Abbreviations: DD = delay discounting; MG = mixed gamble; PDG = probability discounting for gains; PDL = probability discounting for losses; Significance codes: \*\*\*<.001, \*\*<.01, \*<.05, Bonferroni corrected.

## Supplemental Figures

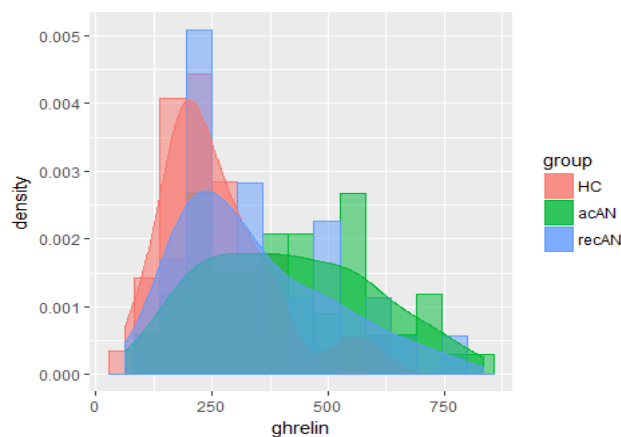

*Online appendices are unedited and posted as supplied by the authors.*

**Figure S1:** Density plot showing distribution of ghrelin concentrations in the different groups in pg/ml.

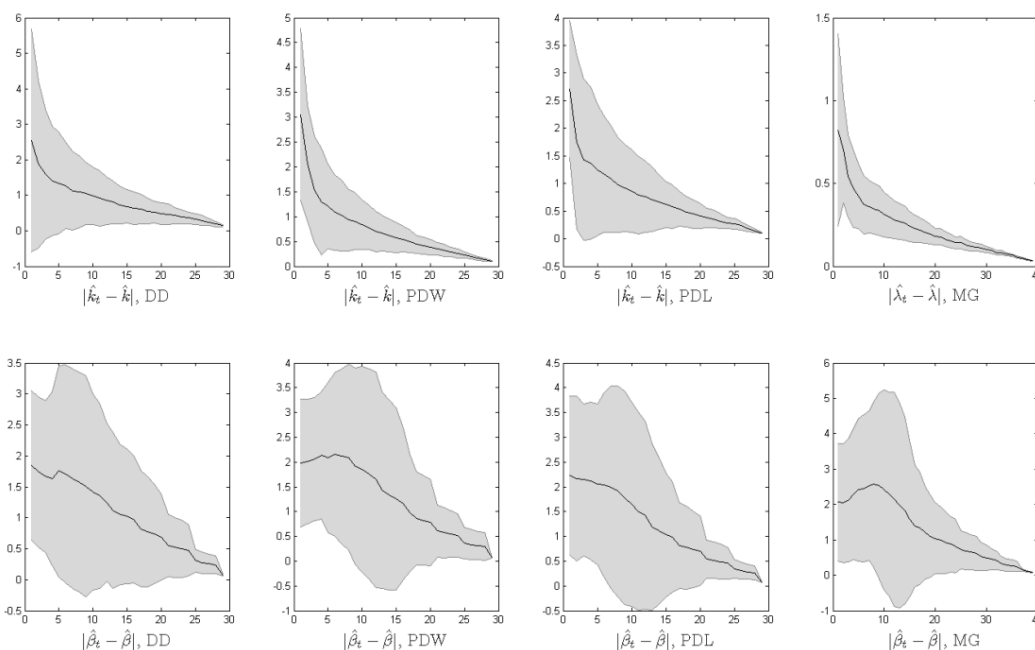

**Figure S2:** Convergence of parameter estimation in participant data. The average absolute differences between the estimation at each trial and the final estimation for all participants are shown trial by trial by black lines. The gray area depicts on standard deviation distance from the average. The decreasing pattern of the black lines is a sign of convergence and the same pattern for standard deviations shows that this is true for the whole group. The top row depicts  $|\hat{k}_t - \hat{k}|$  for DD, PDG, and PDL and  $|\hat{\lambda}_t - \hat{\lambda}|$  for MG; the bottom row shows  $|\hat{\beta}_t - \hat{\beta}|$  for the same tasks.

**Appendix 1** to Ehrlich S, Bernardoni F, Bernhardt N, et al. Metabolic state and decision-making in acute and recovered female patients with anorexia nervosa. *J Psychiatry Neurosci* 2020.

DOI: 10.1503/jpn.190031

Online appendices are unedited and posted as supplied by the authors.

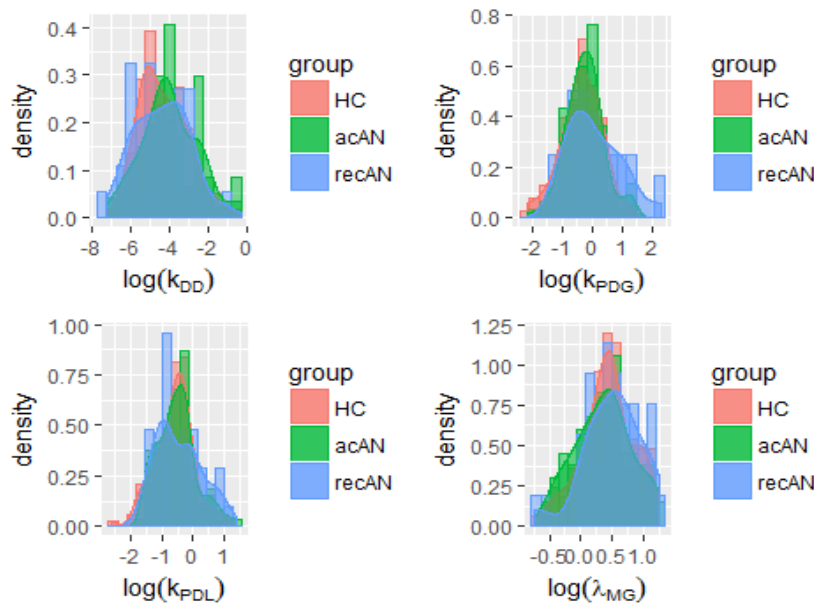

**Figure S3:** Density plot showing distribution of decision making parameters in the different groups. No significant violations from normality were detected.

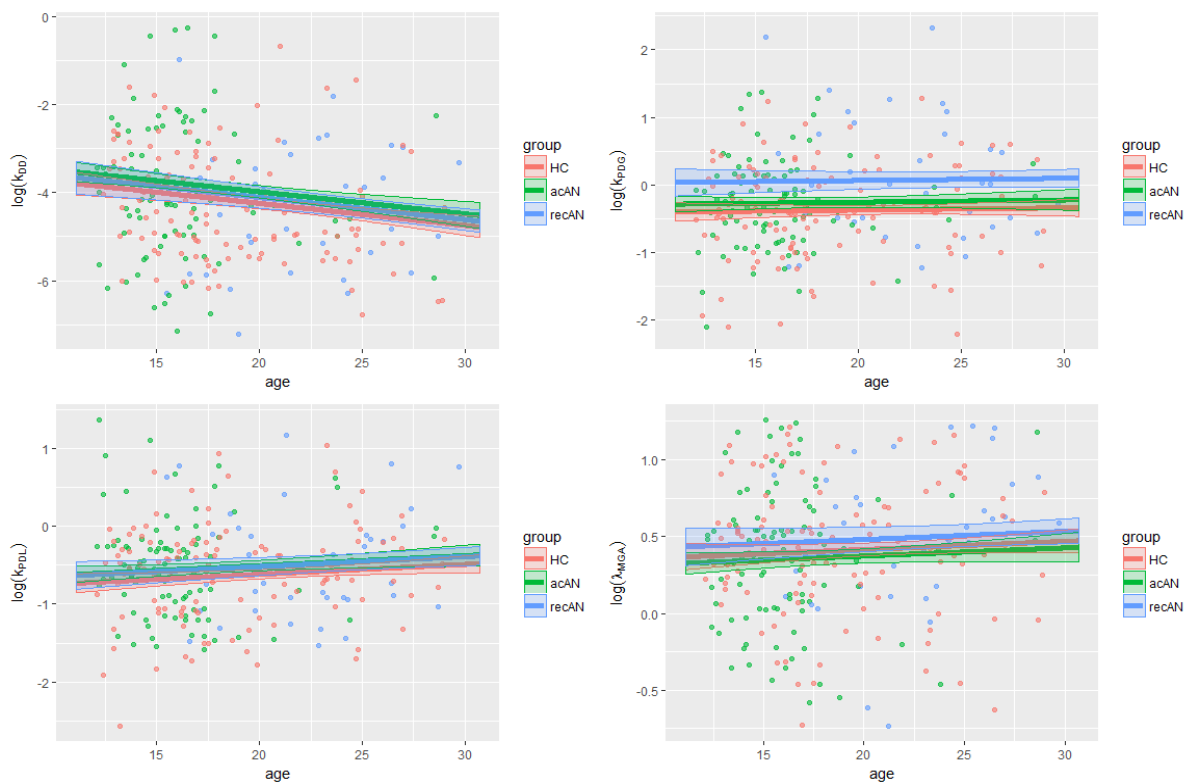



**Figure S4:** Plots showing the associations between the estimated decision-making parameters and age, separate GLMs with group factor and age as covariate. Error bands represent 95% confidence levels.

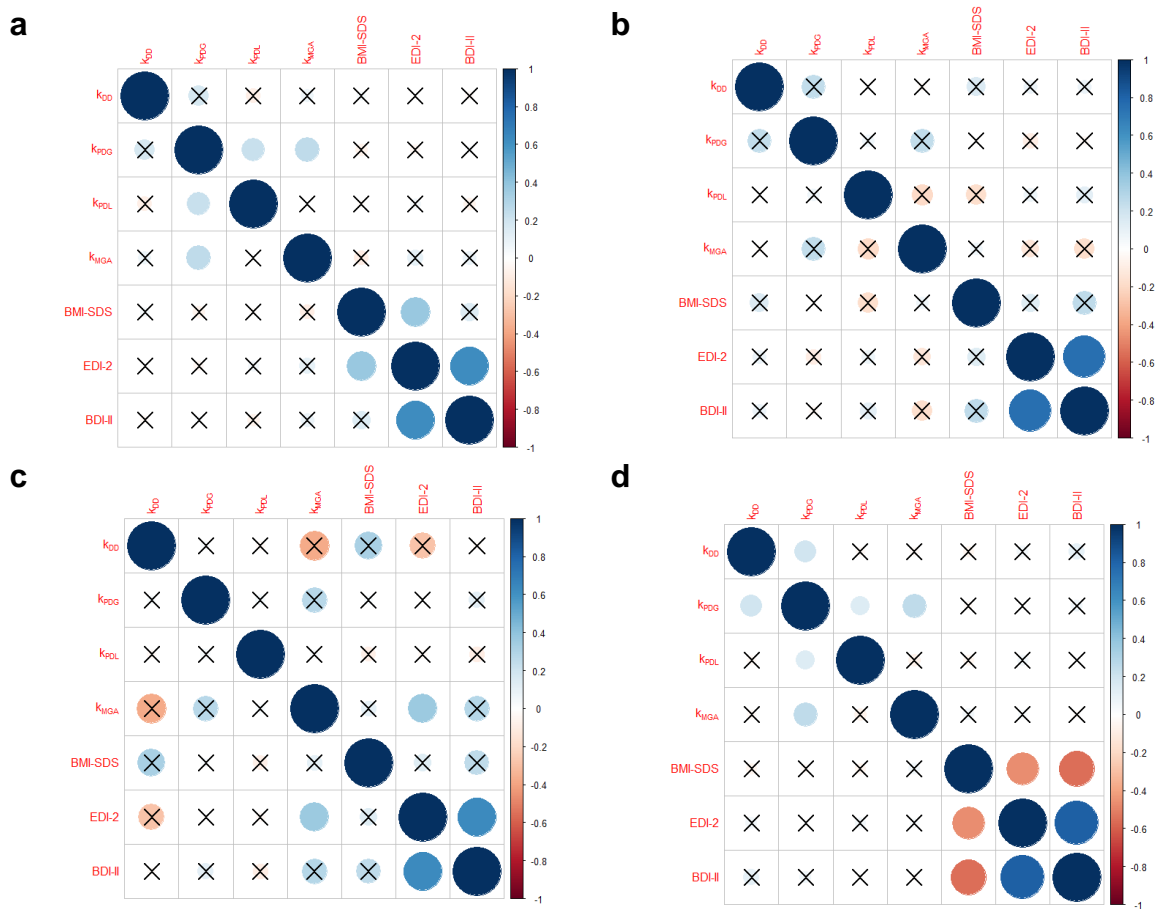

**Figure S5:** Correlations between clinical variables and discounting parameters in the (a) HC, (b) acAN, (c) recAN and the (d) entire sample. FDR corrected. Crosses indicate that the correlation is not significant.

**Appendix 1** to Ehrlich S, Bernardoni F, Bernhardt N, et al. Metabolic state and decision-making in acute and recovered female patients with anorexia nervosa. *J Psychiatry Neurosci* 2020.

DOI: 10.1503/jpn.190031

Online appendices are unedited and posted as supplied by the authors.

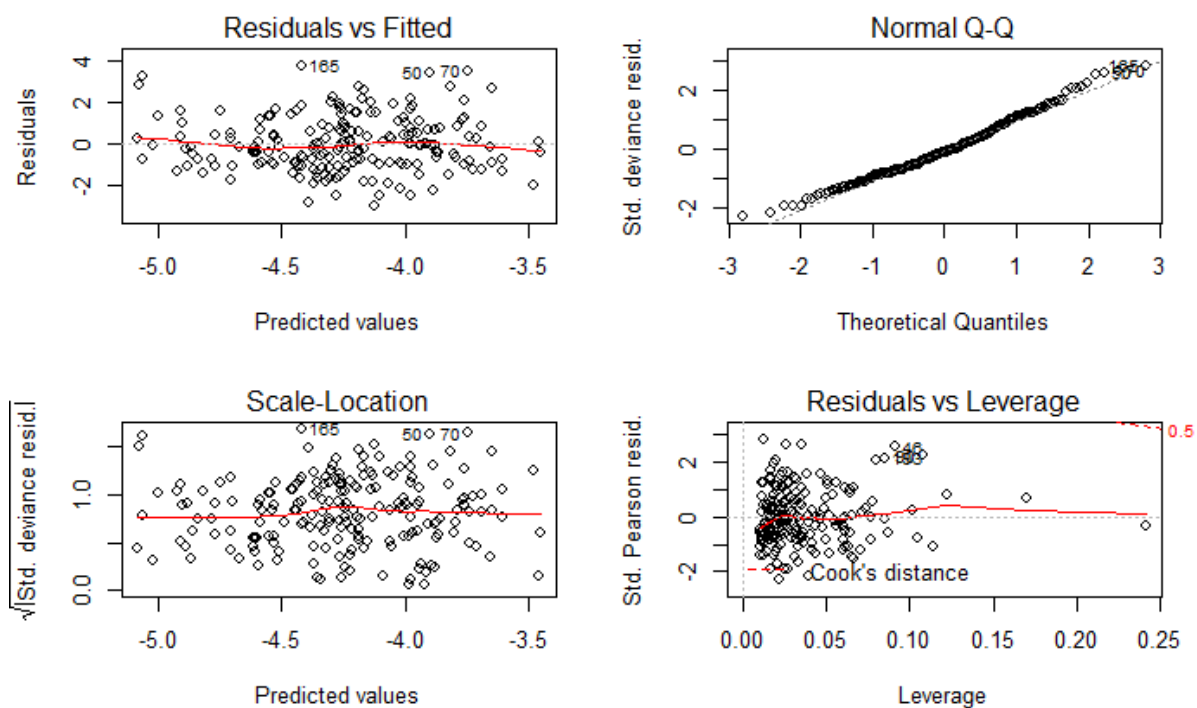

**Figure S6:** Q-Q and residual plots for the GLM with ghrelin as covariate.

## Supplemental References

**Bachner-Melman R, Zohar AH, Ebstein RP** (2006). An examination of cognitive versus behavioral components of recovery from anorexia nervosa. *The Journal of Nervous and Mental Disease* **194**, 697–703.

**Bardone-Cone AM, Wonderlich SA, Frost RO, Bulik CM, Mitchell JE, Uppala S, Simonich H** (2007). Perfectionism and eating disorders: current status and future directions. *Clinical Psychology Review* **27**, 384–405.

**Bernardoni F, Geisler D, King JA, Javadi A-H, Ritschel F, Murr J, Reiter AMF, Rössner V, Smolka MN, Kiebel S, Ehrlich S** (2017). Altered Medial Frontal Feedback Learning Signals in Anorexia Nervosa. *Biological Psychiatry*

**Bernhardt N, Nebe S, Pooseh S, Sebold M, Sommer C, Birkenstock J, Zimmermann US, Heinz A, Smolka MN** (2017). Impulsive Decision Making in Young Adult Social Drinkers and Detoxified

**Appendix 1** to Ehrlich S, Bernardoni F, Bernhardt N, et al. Metabolic state and decision-making in acute and recovered female patients with anorexia nervosa. *J Psychiatry Neurosci* 2020.

DOI: 10.1503/jpn.190031

*Online appendices are unedited and posted as supplied by the authors.*

Alcohol-Dependent Patients: A Cross-Sectional and Longitudinal Study. *Alcoholism, Clinical and Experimental Research* **41**, 1794–1807.

**Bernhardt N, Obst E, Nebe S, Pooseh S, Wurst FM, Weinmann W, Smolka MN, Zimmermann US** (2019). Acute alcohol effects on impulsive choice in adolescents. *Journal of Psychopharmacology* **33**, 316–325.

**Boehm I, Geisler D, Tam F, King JA, Ritschel F, Seidel M, Bernardoni F, Murr J, Goschke T, Calhoun VD, Roessner V, Ehrlich S** (2016). Partially restored resting-state functional connectivity in women recovered from anorexia nervosa. *Journal of psychiatry & neuroscience: JPN* **41**, 377–385.

**Brainard DH** (1997). The Psychophysics Toolbox. *Spatial Vision* **10**, 433–436.

**Couturier J, Lock J** (2006). What is recovery in adolescent anorexia nervosa? *The International Journal of Eating Disorders* **39**, 550–555.

**Deza Araujo YI, Nebe S, Neukam PT, Pooseh S, Sebold M, Garbusow M, Heinz A, Smolka MN** (2018). Risk seeking for losses modulates the functional connectivity of the default mode and left frontoparietal networks in young males. *Cognitive, Affective & Behavioral Neuroscience* **18**, 536–549.

**Ehrlich S, Geisler D, Ritschel F, King JA, Seidel M, Boehm I, Breier M, Clas S, Weiss J, Marxen M, Smolka MN, Roessner V, Kroemer NB** (2015). Elevated cognitive control over reward processing in recovered female patients with anorexia nervosa. *Journal of psychiatry & neuroscience: JPN* **40**, 140249.

**Fichter M, Quadflieg N** (2001). The structured interview for anorexic and bulimic disorders for DSM-IV and ICD-10 (SIAB-EX): reliability and validity. *European Psychiatry: The Journal of the Association of European Psychiatrists* **16**, 38–48.

**Green L, Myerson J, Ostraszewski P** (1999). Amount of reward has opposite effects on the discounting of delayed and probabilistic outcomes. *Journal of Experimental Psychology-Learning Memory and Cognition* **25**, 418–427.

**Hemmelmann C, Brose S, Vens M, Hebebrand J, Ziegler A** (2010). [Percentiles of body mass index of 18-80-year-old German adults based on data from the Second National Nutrition Survey]. *Deutsche Medizinische Wochenschrift (1946)* **135**, 848–852.

**Kahneman D, Tversky A** (1979). Prospect Theory: An Analysis of Decision under Risk. *Econometrica* **47**, 263–291.

**Khalsa SS, Portnoff LC, McCurdy-McKinnon D, Feusner JD** (2017). What happens after treatment? A systematic review of relapse, remission, and recovery in anorexia nervosa. *Journal of Eating Disorders* **5**, 20.

**King JA, Geisler D, Bernardoni F, Ritschel F, Böhm I, Seidel M, Mennigen E, Ripke S, Smolka MN, Roessner V, Ehrlich S** (2016). Altered Neural Efficiency of Decision Making During Temporal Reward Discounting in Anorexia Nervosa. *Journal of the American Academy of Child and Adolescent Psychiatry* **55**, 972–979.

**Kromeyer-Hauschild K, Wabitsch M, Kunze D, Geller F, Geiß HC, Hesse V, Hippel A von, Jaeger U, Johnsen D, Korte W, Menner K, Müller G, Müller JM, Niemann-Pilatus A, Remer T, Schaefer F, Wittchen H-U, Zabransky S, Zellner K, Ziegler A, Hebebrand J** (n.d.). Perzentile für den Body-

**Appendix 1** to Ehrlich S, Bernardoni F, Bernhardt N, et al. Metabolic state and decision-making in acute and recovered female patients with anorexia nervosa. *J Psychiatry Neurosci* 2020.

DOI: 10.1503/jpn.190031

*Online appendices are unedited and posted as supplied by the authors.*

mass-Index für das Kindes- und Jugendalter unter Heranziehung verschiedener deutscher Stichproben. *Monatsschrift Kinderheilkunde* **149**, 807–818.

**Mazur JE** (1987). An adjusting procedure for studying delayed reinforcement. In *Commons M.L., Mazur J.E., Nevin J.A., Rachlin H. (Eds.), Quantitative analysis of behavior: Vol. 5. The effect of delay and of intervening events on reinforcement value (pp. 55–73)*. Hillsdale, NJ: Erlbaum.

**Neukam PT, Kroemer NB, Deza Araujo YI, Hellrung L, Pooseh S, Rietschel M, Witt SH, Schwarzenbolz U, Henle T, Smolka MN** (2018). Risk-seeking for losses is associated with 5-HTTLPR, but not with transient changes in 5-HT levels. *Psychopharmacology* **235**, 2151–2165.

**Pelli DG** (1997). The VideoToolbox software for visual psychophysics: transforming numbers into movies. *Spatial Vision* **10**, 437–442.

**Pooseh S, Bernhardt N, Guevara A, Huys QJM, Smolka MN** (2018). Value-based decision-making battery: A Bayesian adaptive approach to assess impulsive and risky behavior. *Behavior Research Methods* **50**, 236–249.

**Rachlin H, Raineri A, Cross D** (1991). Subjective-Probability and Delay. *Journal of the Experimental Analysis of Behavior* **55**, 233–244.

**Seidel M, King JA, Rietschel F, Boehm I, Geisler D, Bernardoni F, Holzapfel L, Diestel S, Diers K, Strobel A, Goschke T, Walter H, Roessner V, Ehrlich S** (2018). The real-life costs of emotion regulation in anorexia nervosa: a combined ecological momentary assessment and fMRI study. *Translational Psychiatry* **8**, 28.

**Shed NW, Hodgins DC** (2009). Probability Discounting of Gains and Losses: Implications for Risk Attitudes and Impulsivity. *Journal of the Experimental Analysis of Behavior* **92**, 1–16.

**Tom SM, Fox CR, Trepel C, Poldrack RA** (2007). The Neural Basis of Loss Aversion in Decision-Making Under Risk. *Science* **315**, 515–518.
